1 **Cellular advective-diffusion drives the emergence of bacterial surface colonization patterns**  
2 **and heterogeneity**

3 Tamara Rossy<sup>1</sup>, Carey D. Nadell<sup>2\*</sup>, Alexandre Persat<sup>1\*</sup>

4

5 <sup>1</sup> Institute of Bioengineering and Global Health Institute, School of Life Sciences, École  
6 Polytechnique Fédérale de Lausanne, Lausanne, Switzerland

7 <sup>2</sup> Department of Biological Sciences, Dartmouth, Hanover, NH 03755, USA

8 \* Correspondence:

9 Alexandre Persat ([alexandre.persat@epfl.ch](mailto:alexandre.persat@epfl.ch)); Carey Nadell ([carey.d.nadell@dartmouth.edu](mailto:carey.d.nadell@dartmouth.edu))

10 Microorganisms navigate and divide on surfaces to form multicellular structures called biofilms, the  
11 most widespread survival strategy found in the bacterial world<sup>1-4</sup>. One common assumption is that  
12 cellular components guide the spatial architecture and arrangement of multiple species in a biofilm.  
13 However, bacteria must contend with mechanical forces generated through contact with surfaces  
14 under fluid flow, whose contributions to colonization patterns are poorly understood. Here, we show  
15 how the balance between motility and flow promotes the emergence of morphological patterns in  
16 *Caulobacter crescentus* biofilms<sup>5</sup>. By modeling transport of single cells by flow and Brownian-like  
17 swimming, we show that the emergence of these patterns is guided by an effective Péclet number.  
18 By analogy with transport phenomena we show that, counter-intuitively, fluid flow represses mixing of  
19 distinct clonal lineages, thereby affecting the interaction landscapes between biofilm-dwelling  
20 bacteria. This demonstrates that hydrodynamics influence species interaction and evolution within  
21 surface-associated communities.

22 Bacterial motility plays a key role during early biofilm growth<sup>5-8</sup>, but the joint roles of fluid flow and  
23 bacterial surface interactions have only just begun to receive attention<sup>9</sup>. As one might suspect,  
24 hydrodynamic forces can disrupt biofilms<sup>10</sup>, but less intuitively, they can also promote unusual biofilm  
25 structures<sup>11</sup> or alter the evolutionary dynamics of matrix secretion<sup>12</sup>. Given the importance of fluid flow  
26 in remodeling biofilms and in transporting planktonic cells or aggregates, we anticipate that such  
27 forces also modulate spatial organization of surface associated bacterial collectives on many scales.

28 Most microbes have evolved cellular components optimizing their interactions with surfaces<sup>2,13,14</sup>.  
29 *C. crescentus* is particularly well-adapted to life on surfaces under flow: polar stalk and holdfast confer  
30 strong attachment and its curved morphology promotes biofilm formation in flow<sup>15</sup>. During the process  
31 of growth on surface, *C. crescentus* mother cells asymmetrically divide into a non-motile stalked cell  
32 and a new motile daughter swarmer cell<sup>16</sup>. The characteristic curved shape of *C. crescentus* promotes  
33 local surface colonization of daughter cells by reorienting the body of sessile mother cells in the  
34 direction of the flow, accelerating accumulation of biomass near the founder cell<sup>17</sup>. Thus, during  
35 sessile division in flow, daughter swarmer cells may either attach immediately downstream their  
36 mother or explore the surrounding fluid to later reattach. The former depends on cell shape while the

37 latter must depend on fluid transport mechanisms. The relative importance of these two surface  
38 colonization modes will, we predict, dramatically influence the basal architecture and cell lineage  
39 structure of nascent biofilm populations.

40 To investigate the contributions of fluid flow to surface colonization patterns, we exposed surface-  
41 associated cells to controlled flow in microchannels. In relatively weak flow ( $2 \text{ mm}\cdot\text{s}^{-1}$ ), *C. crescentus*  
42 rapidly and uniformly colonizes the surface (Fig. 1a, top). In contrast, spatial patterns of colonization  
43 emerged in strong flow ( $27 \text{ mm}\cdot\text{s}^{-1}$ ), where biofilms grew into sparse, dense microcolonies (Fig. 1a,  
44 bottom). Surface occupation dramatically drops for growth at mean fluid velocity higher than  $4 \text{ mm}\cdot\text{s}^{-1}$   
45 (Fig. 1c, left). Visualization at higher spatial resolution highlights the presence of many isolated single  
46 cells in weaker flow, which are absent in stronger flows. As a result, clusters are generally small in  
47 weak flow ( $< 40 \mu\text{m}^2$ ), in comparison to strong flows ( $>100 \mu\text{m}^2$ ) (Fig. 1c, right). Thus, flow promotes  
48 the emergence of multicellular patch-like patterns at the channel surface but slows down surface  
49 occupation.

50 During *C. crescentus* asymmetric division, unattached progeny is released into the fluid bulk (Fig.  
51 2a). Dynamic visualizations of surface colonization highlight that, in strong flow, biofilms develop from  
52 single founder cells (Supplementary Movie 1), whereas in weak flow, new founder cells frequently  
53 attach to the surface, speeding up the overall rate of colonization and homogenizing surface coverage  
54 (Supplementary Movie 2 and Fig. 1c, center). We thus suspected that the relative contribution of  
55 random spatial exploration by swimming motility, and flow transport may enable reattachment. To  
56 demonstrate this, we abolished swimming motility by deleting the flagellar gene *flgE*. For this strain,  
57 flow is the dominant transport mechanism of swarmer cells. Fig. 2b shows a comparison between  
58 biofilms formed by wild-type (WT) and *flgE* in weak flow. In contrast to WT, flagellum-less cells  
59 colonize the surface into patch-like patterns and with an apparent decrease in single isolated cells,  
60 similarly to the WT in intermediate flow (Fig. 1b, center). This demonstrates that motility plays a critical  
61 role in controlling surface occupation density and distribution.

62 Flow transports bacteria directionally along streamlines, whereas cells swim in diffusive,  
63 Brownian-like trajectories in the absence of chemical gradients<sup>18</sup>. We therefore drew an analogy with

64 advective-diffusion transport problems: the balance between flow-driven advective transport of single  
65 cells and their diffusive flagellar motility must contribute to the distinct colonization patterns observed  
66 in our experiments. We thus developed a scaling for the probability of attachment of a free-swimming  
67 bacterium as a function of fluid velocity by reasoning in terms of timescales. Fluid flow transports  
68 swarmer bacteria from their division site towards the channel outlet in a characteristic time  $\tau_a = L/v$ ,  
69 where  $L$  is the microchannel length and  $v$  the mean flow velocity. During this time, a cell explores the  
70 depth of the channel by swimming, effectively diffusing in the direction perpendicular to the surface  
71 with characteristic timescale  $\tau_D = h^2/D$ , where  $h$  is the channel height and  $D$  the effective diffusion  
72 coefficient of a bacterium attributed to unbiased swimming<sup>18</sup>. The probability that a free-swimming  
73 bacterium reattaches to the surface depends on the ratio of these two timescales:  $\tau_D/\tau_a =$   
74  $(h^2v)/(DL)$ , a non-dimensional quantity resembling a Péclet number ( $Pe$ ), which measures the  
75 relative contributions of advective to diffusive transport<sup>19</sup>. At large  $Pe$  ( $\tau_a \ll \tau_D$ ) cells are rapidly  
76 washed out of the channel before encountering the surface so that the probability of attachment is  
77 low ( $p_{att} \sim 0$ ). In contrast, at very low  $Pe$  diffusion dominates over flow; a planktonic cell has sufficient  
78 time to reach the surface before being flushed out of the channel, and may eventually reattach to the  
79 surface away from its stalked parent ( $p_{att} \sim 1$ ). To validate this scaling, we measured the attachment  
80 rate of planktonic cells as a function of applied flow velocity. We counted the number of cells attaching  
81 onto the surface per unit time, and estimated the corresponding  $p_{att}$ . We found that attachment  
82 probability scales with  $Pe^{-1}$  (Fig. 2c), which is consistent with the advection-diffusion model, validating  
83 our physical explanation of surface colonization rates.

84 While patterns of surface colonization are crucial for initiating biofilm growth, they can also set the  
85 foundation for clonal lineage structure, a key factor influencing the evolution of microbial interaction  
86 traits<sup>20</sup>. The spatial structure of biofilms is heterogeneous and dynamic<sup>20</sup>. Natural biofilms are thought  
87 to commonly include multiple strains and species that can be organized in a variety of three-  
88 dimensional patterns<sup>21</sup>. The spatial arrangements of such multi-species consortia can dramatically  
89 impact evolution of cell-cell interactions, and vice versa<sup>20</sup>. The mechanisms by which environmental

90 conditions, such as fluid flow, and microbial response to these factors influence the spatial  
91 architecture of polymicrobial communities, however, are still unclear.

92 In mass transport phenomena, the balance between advective and diffusive transport strongly  
93 influences mixing of fluids and solutes<sup>19</sup>. By analogy, we reasoned that since surface occupation by  
94 *C. crescentus* is governed by advective diffusion, flow may also impact the mixing of distinct cell  
95 lineages and their social interactions. We grew *C. crescentus* biofilms in various flow conditions,  
96 starting from a one-to-one mixture of strains constitutively expressing mKate or Venus fluorescent  
97 proteins whose doubling times are identical<sup>17</sup> (Fig. 3a). Consistent with advective-diffusion transport,  
98 surface populations of mKate- and Venus-expressing cells were well mixed in weak flow. There was  
99 no clear region where clonal lineages were segregated at scales larger than 10  $\mu\text{m}$ . Within seemingly  
100 homogeneous clonal groups of cells, we could generally find invaders expressing the other  
101 fluorescence protein. At higher flow velocity, clonal groups were larger and segregated from each  
102 other, suggesting that they originated from a single parent cell.

103 The distribution of cross-lineage colony distances effectively measures segregation and thus  
104 strongly depends on flow intensity: in intermediate flow, all colonies expressing a given fluorescent  
105 protein are at most  $\sim 20 \mu\text{m}$  away from their nearest counterpart (Fig. 3b). The distribution is heavily  
106 weighted at low values of nearest neighbor distance (standard deviation =  $3.5 \mu\text{m}$ ). In contrast, at  
107 high flow intensity, the distribution of cross-lineage colony distances broadens dramatically (standard  
108 deviation =  $12.8 \mu\text{m}$ ). Colonies from each color variant can be separated by as much as  $50 \mu\text{m}$ , and  
109 there is a substantial decrease in the frequency of small intercolony distances. This shift in distribution  
110 occurs progressively as flow intensity increases: the mean cross-lineage distance indeed increases  
111 as a function of mean flow velocity, demonstrating that segregation strengthens with flow (Fig. 3c).  
112 These observations are consistent with a model where the balance between advection and diffusion  
113 of planktonic cells and deposition of daughter cells adjacent to their points of origin dictates the level  
114 of clonal structure within nascent *C. crescentus* biofilms. At high *Pe*, flow represses mixing of clones  
115 by carrying planktonic cells far from their parent, while at low *Pe* motility drives diffusive swimming  
116 trajectories to promote clonal mixing (Supplementary Fig. 1). We confirmed this by observing a

117 reduction of clonal mixing of flagellum-less mutant at low flow intensity (Supplementary Fig. 2). Finally,  
118 we noted that clonal patterns are conserved later in the colonization process. After 6 days of growth,  
119 biofilms in both weak and strong flow regimes covered the surface entirely and extended into the  
120 channel depth, but, importantly, retained the clonal structure set by the initial patterns of surface  
121 occupation (Fig. 3d). The three-dimensional spatial distribution of clones remained highly mixed at  
122 low flow and relatively segregated at high flow (Supplementary Fig. 3).

123 We demonstrated that the multi-scale feedbacks between surface attachment, daughter cell  
124 deposition, fluid transport, and dispersion by diffusion exert a strong influence on the morphological,  
125 spatial and genetic structure of biofilm populations. The early stages of surface colonization can set  
126 the foundations of subsequent biofilm architecture, influencing the spatial distributions of different  
127 strains and species, and the community's interaction networks. One critical ingredient to this process  
128 is probabilistic local attachment versus planktonic release of daughter cells. Such asymmetries in  
129 adhesive properties may very likely appear between two daughter cells that are dividing  
130 symmetrically<sup>22</sup>. For example, a memory effect in *Pseudomonas aeruginosa* yields strong differences  
131 in the adhesive behavior of two sessile daughter cells, nearly recapitulating the pattern of  
132 *C. crescentus*, despite the absence of obvious cellular asymmetry<sup>6,23,24</sup>. The balance between  
133 directional advective and random diffusive trajectories of planktonic cells constitutes a second  
134 ingredient setting the spatial structure of biofilm communities. A Péclet number can be used to predict  
135 the emergence of motility- and flow-induced morphological transitions. In the same manner, a Péclet  
136 number quantifying the relative contribution of directional cell displacement to rotational diffusion  
137 describes phase-like transitions between multicellular phases in *Myxococcus xanthus*<sup>25</sup>.

138

### 139 **Author Contributions**

140 T.R., C.N. and A.P conceptualized the study, T.R. performed experiments and data analysis. T.R.,  
141 C.N. and A.P. wrote the manuscript.

142

143

144 **Acknowledgements**

145 TR and AP are supported by the Swiss National Science Foundation, Projects grant 31003A\_169377  
146 and the Giorgio Cavaglieri Foundation. CDN is supported by the National Science Foundation (MCB  
147 1817342), a Burke Award from Dartmouth College, a pilot award from the Cystic Fibrosis Foundation  
148 (STANTO15RO), and NIH grant P20-GM113132 to the Dartmouth BioMT COBRE.

149

150

151 **Competing interests:** Authors declare no competing interests.

152 **Data availability:** All data are available from the corresponding author upon reasonable request.

153 **Code availability:** All codes are available from the corresponding author upon reasonable request.

154

155 **Methods:**

156 *Design and fabrication of the microfluidic chips*

157 We fabricated the microfluidic chips following standard soft lithography techniques. More specifically,  
158 for the 24h- and 48h-long biofilm experiments, we designed 1 cm-long, 500 or 250  $\mu\text{m}$ -wide channels  
159 in Autodesk AutoCAD 2018 and printed them on a soft plastic photomask. We then coated silicon  
160 wafers with photoresist (SU8 2025, Microchem), with varying thicknesses (25  $\mu\text{m}$ , 50  $\mu\text{m}$  and 90  $\mu\text{m}$ )  
161 to allow a wider range of mean flow velocities for identical flow rate settings. The wafer was exposed  
162 to UV light through the mask and developed in PGMEA (Sigma-Aldrich) in order to produce a mold.  
163 PDMS (Sylgard 184, Dow Corning) was subsequently casted on the mold and cured at 80°C for about  
164 1h30. After cutting out the chips, we punched 1 mm inlet and outlet ports. We finally bonded the  
165 PDMS chips to glass coverslips (Marienfeld 1.5) in a ZEPTO plasma cleaner (Diener electronic). To  
166 fabricate channels for the 6 day-long biofilm experiments, we followed a similar procedure, but  
167 adjusted the dimensions of the channel to leave more space for large 3D structures to form. More  
168 precisely, the channel was 2 mm wide, 110  $\mu\text{m}$  high.

169

170 *Bacterial strains*

171 We used strain CB15 constitutively expressing a fluorescent protein (Venus or mKate)<sup>17</sup>. These  
172 bacteria grew in peptone yeast extract medium supplemented with 5 µg/ml of kanamycin (PYE-Kan),  
173 in a shaking incubator set to 30°C. For the experiments involving non-motile CB15, we inserted either  
174 mKate or Venus in a flagellum-less mutant, CB15 *flgE*<sup>-17</sup>. We prepared electrocompetent CB15 *flgE*-  
175 by centrifuging 3 ml of stationary phase culture and rinsing it two times with cold Milli-Q water (Merck  
176 Millipore). About 600 ng of plasmid (either Venus or mKate) were added for transformation and the  
177 bacteria were then plated on PYE-Kan plates.

178

179 *Biofilm growth in microfluidic chambers*

180 At the start of every experiment, the bacterial cultures had an optical density of approximately 0.15  
181 ( $\sim 4.5 \cdot 10^8$  CFU.ml<sup>-1</sup>). Equal volumes of CB15 mKate and CB15 Venus were diluted in PYE-Kan to a  
182 final 1:10 concentration. We then loaded the bacterial mixture in a microchannel using a micropipette,  
183 and let them adhere for 3 minutes before washing the channel with PYE-Kan. For all conditions but  
184 the highest flow velocity ( $v = 68$  mm.s<sup>-1</sup> for 24h biofilms, and  $v = 20$  mm.s<sup>-1</sup> for 6-day biofilms), we  
185 connected the inlet port to a disposable PYE-Kan-filled syringe (BD Plastipak) using a 1.09 mm outer  
186 diameter polyethylene tube (Instech) and a 27G needle (Instech). The syringe was then mounted onto  
187 a syringe pump (ZS100, ChuangRui Pump). For the highest flow conditions ( $v = 68$  mm.s<sup>-1</sup> for 24h  
188 biofilms, and  $v = 20$  mm.s<sup>-1</sup> for 6-day biofilms), we connected the inlet port to a PYE-Kan-filled beaker  
189 via two imbricated tubes (polyethylene tubing as described above, and Tygon-LFL tubes with an inner  
190 diameter of 0.76 mm (Ismatec)). We mounted the setup onto a peristaltic pump (MCP, Ismatec)  
191 allowing us to work with larger volumes than the syringe pump. For every experiment, we connected  
192 the outlet port to a waste container using polyethylene tubing. We finally placed the chip in a 30°C  
193 incubator and applied a controlled flow of PYE-Kan to the microchannels for 24h, 48h or 6 days



194 depending on the experiment. The mean flow velocity ( $v$ ) was calculated from the selected flow rate  
195 ( $Q$ ) and channel cross-sectional area ( $A$ ) as such:  $v = Q/A$ .

196

### 197 *Visualization*

198 For all visualizations of biofilms grown up to 48h, we used a Nikon TiE epifluorescence microscope  
199 equipped with a Hamamatsu ORCA Flash 4 camera and a 40X Plan APO NA 0.9 objective. The full-  
200 channel images were stitched using the NIS-Elements software. All single cell level pictures  
201 presented in this work were taken 9 mm away downstream of the inlet. For the timelapse experiments  
202 (Supplementary Movies 1 and 2), we acquired images every 5 minutes for 24 hours. To visualize 6  
203 day old biofilms, we used a Leica SP8 confocal microscope equipped with a white laser, a 25X HC  
204 FLUOTAR NA 0.95, water-immersion objective, as well as a 63X HC PL APO NA 1.40 oil-immersion  
205 objective for high magnification z-stack acquisitions. We used Imaris (Bitplane) for three-dimensional  
206 rendering of z-stack pictures (Supplementary Fig. 3).

207

### 208 *Data analysis*

209 Data analysis was conducted using Matlab (Mathworks). The images were segmented using an  
210 adaptive threshold, the sensitivity of which varied depending on the median intensity of the picture.  
211 Similarly, the percentage of background removed was also determined by the median intensity.  
212 Finally, we filtered out objects smaller than 15 pixels, since this value was observed to be the minimal  
213 area of a single cell standing vertically. After segmentation, pictures were visually assessed to ensure  
214 good quality of segmentation. In rare cases (4 pictures out of 50), segmentation was unsatisfying and  
215 the images had to be excluded from the analysis.

216 To calculate the surface coverage and microcolony area, we merged the segmented pictures  
217 originating from mKate and Venus using the logical *or* function. To quantify surface coverage, we  
218 divided the area of white pixels (i.e. pixels containing a part of cell) by the total area of an image.

219 We observed that single cell clusters were difficult or even impossible to discriminate by eye when  
220 surface coverage was larger than 80%. Therefore, we only included segmented pictures with a  
221 surface coverage  $\leq 80\%$  for the measurement of microcolony area. We also filtered out any object  
222 smaller than 200 pixels, which approximately corresponds to a group of five cells (average cell size:  
223  $1.29 \mu\text{m}^2 \approx 40.2$  pixels,  $N = 80$  cells). We then closed the pictures using a built-in Matlab function (with  
224 a disk structuring element having a radius of five pixels) and calculated the area of every colony. The  
225 median colony area was finally calculated for each image.

226 To quantify the degree of mixing of the biofilms, we again only studied segmented pictures with a  
227 surface coverage  $\leq 80\%$ . Additionally, unlike for surface coverage and colony area quantification, we  
228 analyzed mKate and Venus pictures separately. We closed all the pictures as mentioned above. We  
229 then calculated the distance between the centroid of an object and its nearest neighbor expressing  
230 the other fluorescent protein, using the built-in Matlab function *knnsearch*. This operation was  
231 repeated for every object in every picture. Finally, the mean cross-lineage distance was calculated  
232 for each experimental condition, taking into account distances from both fluorescently-labeled  
233 populations.

234

### 235 *Estimation of the probability of attachment as a function of Pe*

236 To estimate the attachment probability of swarmer *C. crescentus* in different flow conditions, we  
237 flowed CB15 Venus cells in a 500  $\mu\text{m}$ -wide, 90  $\mu\text{m}$ -high microchannel using a syringe pump. The flow  
238 rates varied between 0.81 and 270  $\mu\text{l}\cdot\text{min}^{-1}$  (mean flow velocities from 0.3 to 100  $\text{mm}\cdot\text{s}^{-1}$  respectively).  
239 Each condition was repeated two to three times. Bacteria were visualized by fluorescence microscopy  
240 (one frame recorded every second during one minute) and single attachment events were counted.  
241 Bacteria had to remain on the surface for at least 3 consecutive frames at the same location to be  
242 counted as attached. The number of bacteria attached over time was plotted for each flow condition  
243 and, using a linear fit, we extracted the attachment rate from the slope of these curves. The  
244 attachment probability was then computed as follows:

245

$$p_{att} = \frac{r}{J \cdot A} = \frac{r}{Q \cdot C}$$

246

247

248

249

250

251

252

253

254

255

256

## Bibliography

257

258

259

260

261

262

263

264

265

266

267

268

269

1. Flemming, H.-C. *et al.* Biofilms: an emergent form of bacterial life. *Nat. Rev. Microbiol.* **14**, 563–575 (2016).
2. Colvin, K. M. *et al.* The pel polysaccharide can serve a structural and protective role in the biofilm matrix of *Pseudomonas aeruginosa*. *PLoS Pathog.* **7**, e1001264 (2011).
3. Vidakovic, L., Singh, P. K., Hartmann, R., Nadell, C. D. & Drescher, K. Dynamic biofilm architecture confers individual and collective mechanisms of viral protection. *Nat Microbiol* **3**, 26–31 (2018).
4. Nadell, C. D., Drescher, K., Wingreen, N. S. & Bassler, B. L. Extracellular matrix structure governs invasion resistance in bacterial biofilms. *ISME J* **9**, 1700–1709 (2015).
5. Entcheva-Dimitrov, P. & Spormann, A. M. Dynamics and Control of Biofilms of the Oligotrophic Bacterium *Caulobacter crescentus*. *J. Bacteriol.* **186**, 8254–8266 (2004).
6. Lee, C. K. *et al.* Multigenerational memory and adaptive adhesion in early bacterial biofilm communities. *PNAS* 201720071 (2018).

- 270 7. O'Toole, G. A. & Kolter, R. Flagellar and twitching motility are necessary for *Pseudomonas*  
271 *aeruginosa* biofilm development. *Mol. Microbiol.* **30**, 295–304 (1998).
- 272 8. Zhao, K. *et al.* Psl trails guide exploration and microcolony formation in *Pseudomonas*  
273 *aeruginosa* biofilms. *Nature* **497**, 388–391 (2013).
- 274 9. Martinez-Garcia, R., Nadell, C. D., Hartmann, R., Drescher, K. & Bonachela, J. A. Cell adhesion  
275 and fluid flow jointly initiate genotype spatial distribution in biofilms. *arXiv preprint*  
276 *arXiv:1801.08189* (2018).
- 277 10. Stoodley, P., Cargo, R., Rupp, C. J., Wilson, S. & Klapper, I. Biofilm material properties as  
278 related to shear-induced deformation and detachment phenomena. *J Ind Microbiol Biotech* **29**,  
279 361–367 (2002).
- 280 11. Drescher, K., Shen, Y., Bassler, B. L. & Stone, H. A. Biofilm streamers cause catastrophic  
281 disruption of flow with consequences for environmental and medical systems. *Proc. Natl. Acad.*  
282 *Sci. U.S.A.* **110**, 4345–4350 (2013).
- 283 12. Nadell, C. D., Ricaurte, D., Yan, J., Drescher, K. & Bassler, B. L. Flow environment and matrix  
284 structure interact to determine spatial competition in *Pseudomonas aeruginosa* biofilms. *eLife*  
285 *Sciences* **6**, e21855 (2017).
- 286 13. Berne, C., Ellison, C. K., Ducret, A. & Brun, Y. V. Bacterial adhesion at the single-cell level.  
287 *Nature Reviews Microbiology* **1** (2018).
- 288 14. Persat, A. *et al.* The Mechanical World of Bacteria. *Cell* **161**, 988–997 (2015).
- 289 15. Tsang, P. H., Li, G., Brun, Y. V., Freund, L. B. & Tang, J. X. Adhesion of single bacterial cells in  
290 the micronewton range. *Proc. Natl. Acad. Sci. U.S.A.* **103**, 5764–5768 (2006).
- 291 16. Laub, M. T., Shapiro, L. & McAdams, H. H. Systems biology of *Caulobacter*. *Annu. Rev. Genet.*  
292 **41**, 429–441 (2007).
- 293 17. Persat, A., Stone, H. A. & Gitai, Z. The curved shape of *Caulobacter crescentus* enhances  
294 surface colonization in flow. *Nature Communications* **5**, (2014).
- 295 18. Berg, H. C. *Random walks in biology*. (Princeton University Press, 1993).
- 296 19. Stone, H. A., Stroock, A. D. & Ajdari, A. Engineering Flows in Small Devices: Microfluidics  
297 Toward a Lab-on-a-Chip. *Annual Review of Fluid Mechanics* **36**, 381–411 (2004).

- 298 20. Nadell, C. D., Drescher, K. & Foster, K. R. Spatial structure, cooperation and competition in  
299 biofilms. *Nature Reviews Microbiology* **14**, 589 (2016).
- 300 21. Welch, J. L. M., Rossetti, B. J., Rieken, C. W., Dewhirst, F. E. & Borisy, G. G. Biogeography of a  
301 human oral microbiome at the micron scale. *PNAS* **113**, E791–E800 (2016).
- 302 22. Duvernoy, M.-C. *et al.* Asymmetric adhesion of rod-shaped bacteria controls microcolony  
303 morphogenesis. *Nature Communications* **9**, (2018).
- 304 23. Christen, M. *et al.* Asymmetrical Distribution of the Second Messenger c-di-GMP upon Bacterial  
305 Cell Division. *Science* **328**, 1295–1297 (2010).
- 306 24. Gordon, V. D., Davis-Fields, M., Kovach, K. & Rodesney, C. A. Biofilms and mechanics: a  
307 review of experimental techniques and findings. *J. Phys. D: Appl. Phys.* **50**, 223002 (2017).
- 308 25. Liu, G. *et al.* A motility-induced phase transition drives *Myxococcus xanthus* aggregation.  
309 *arXiv:1709.06012 [cond-mat, physics:physics, q-bio]* (2017).

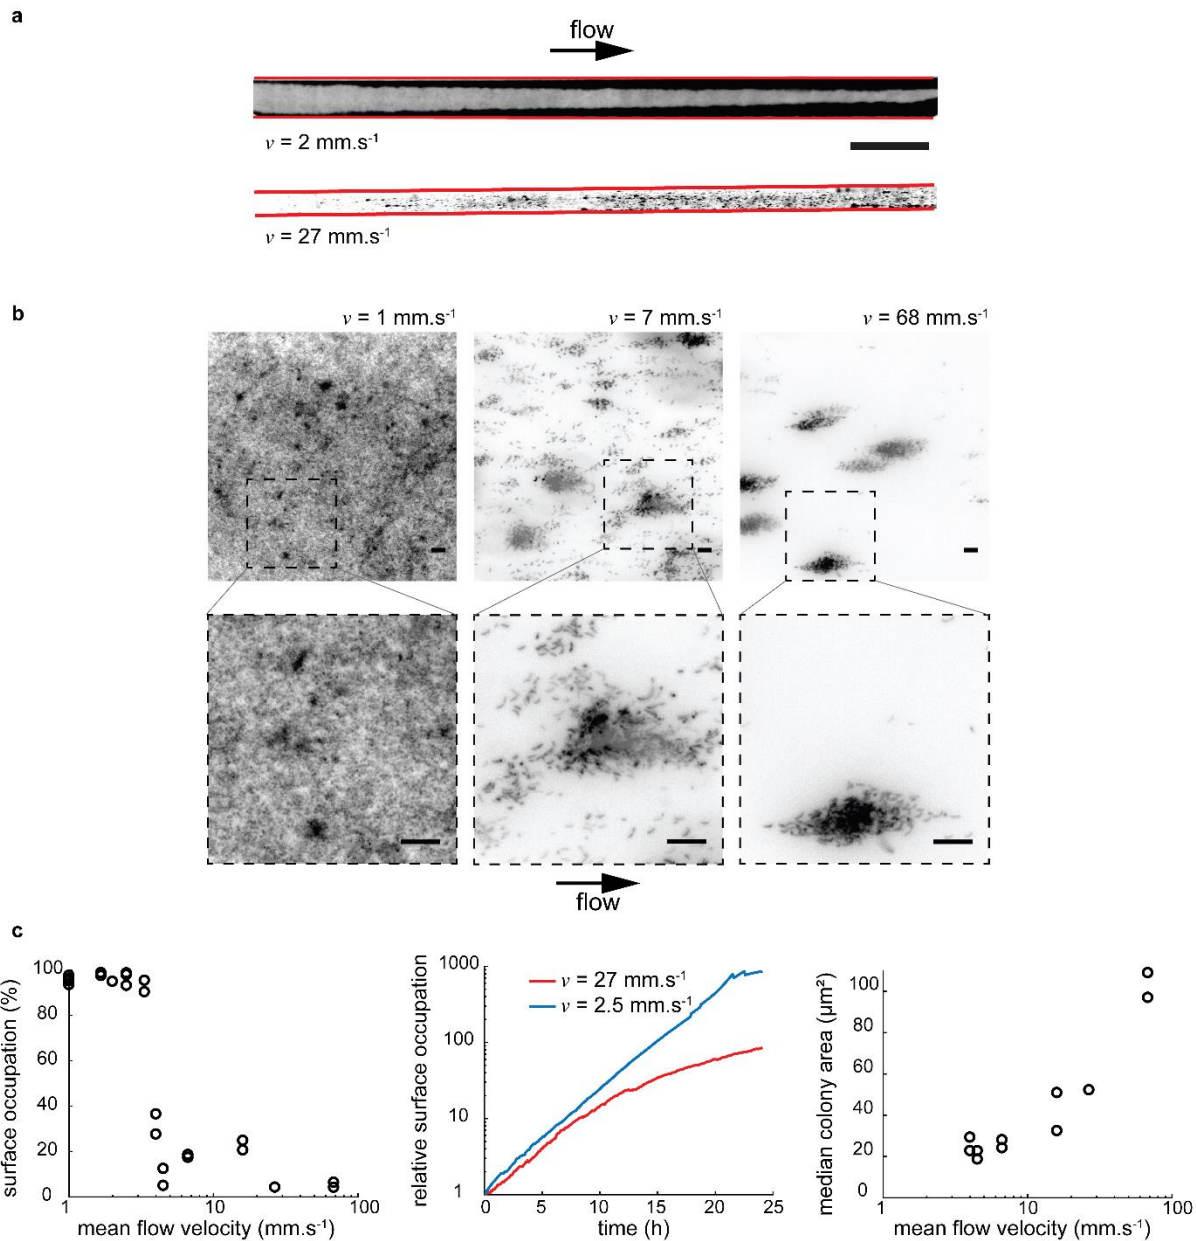

310

311 **Figure 1: Flow modulates *C. crescentus* colonization patterns.** (a) Grayscale display of fluorescence  
312 microscopy images of *C. crescentus* after 48h exposure to fluid flow in microchannels. In weak flow (top),  
313 surface colonization is uniform. In strong flow (bottom), biofilms grow into patterns of discrete cell clusters. The  
314 edges of the microchannel are highlighted in red. Scale bar: 1 mm. (b) Colonization patterns at the channel  
315 centerline at three representative flow velocities, after 24h of colonization under flow. The bottom images show  
316 close-up views to distinguish single cells. In weaker flow (left), the channel surface is nearly saturated. At  
317 intermediate flow (middle), multicellular clusters are surrounded by smaller groups or single isolated cells. In  
318 strong flow (right), biofilms grow mainly as multicellular clusters. Scale bars: 10  $\mu\text{m}$ . (c) Fluid flow modulates  
319 kinetics and pattern geometry during surface colonization. Surface occupation after 24h of growth as a function

320 of mean flow velocity (left). Each data point corresponds to an individual experiment. Surface occupation over  
 321 time for two representative flow velocities (center). Median microcolony area after 24h of growth as a function  
 322 of mean flow velocity (right).

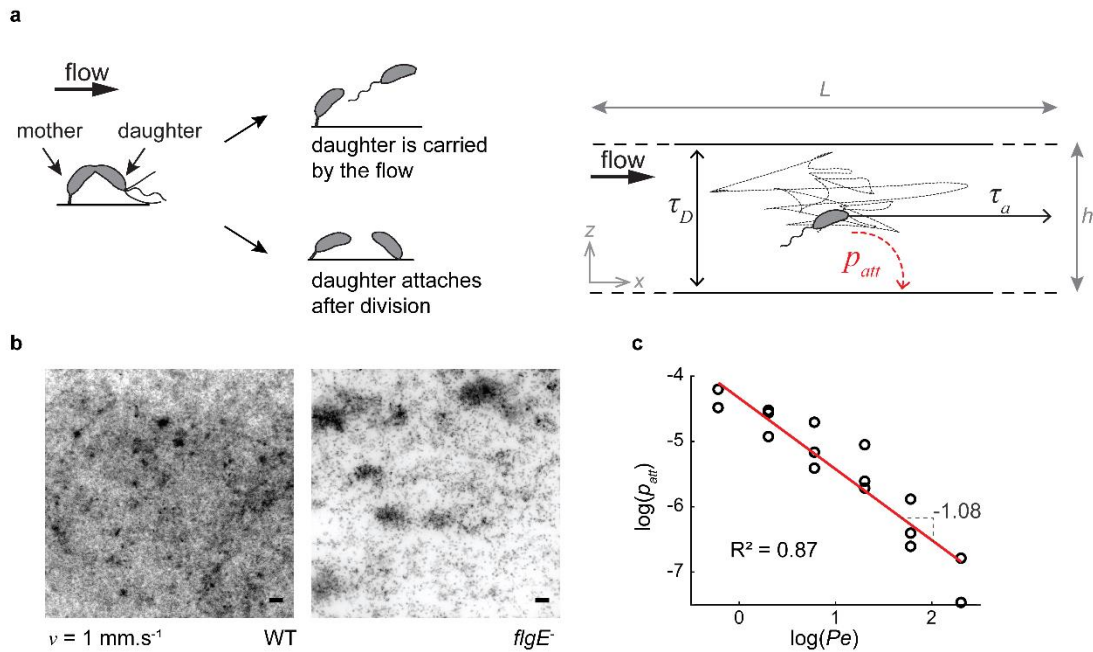

323

324 **Figure 2: Physical mechanism for modulation of *C. crescentus* biofilm architecture. (a)** *C. crescentus*  
 325 divides asymmetrically: the mother cell is anchored to the surface and undergoing division. At the time of  
 326 division, a daughter cell can either attach to the surface or be carried by the flow. If attachment occurs, the  
 327 daughter immediately synthesizes a holdfast contributing to clonal expansion on the surface. If the daughter  
 328 cell does not attach to the surface, it is subject to: (i) advective transport by fluid flow and (ii) diffusion-like  
 329 transport generated by unbiased swimming. **(b)** Contribution of bacterial motility to surface colonization patterns.  
 330 Fluorescence microscopy images of wild-type (WT) or flagellum-less (*flagE*<sup>-</sup>) *C. crescentus* after 24h exposure  
 331 to fluid flow (1 mm.s<sup>-1</sup>). *flagE*<sup>-</sup> colonizes the surface less densely and less uniformly than WT, qualitatively  
 332 recapitulating the results observed in stronger flow for WT. Scale bars: 10 μm. **(c)** Attachment probability  
 333 (attachment rate normalized by total bacterial flux) as a function of the Péclet number (*Pe*) on a logarithmic  
 334 scale. A linear fit of the data indicates swarmer adhesion probability scales with *Pe*<sup>-1</sup>, as suggested by our  
 335 advective-diffusion model.

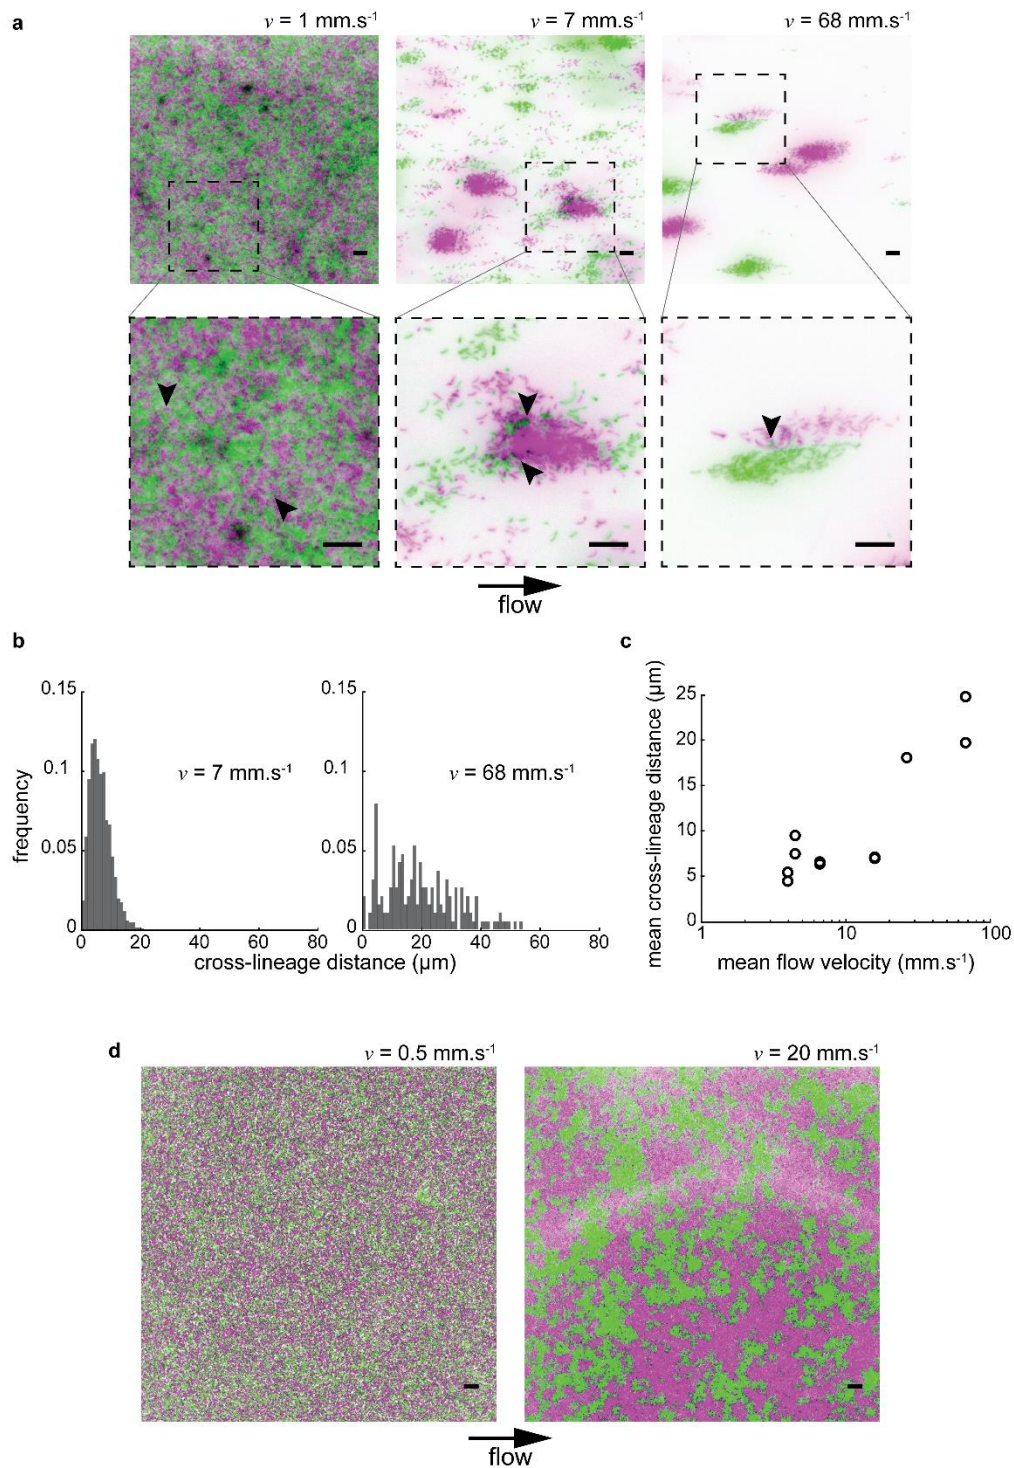

336

337 **Figure 3: Flow modulates clonal structuring of *C. crescentus* biofilms.** (a) Fluorescence microscopy  
338 images of *C. crescentus* biofilms (24h). Two populations at equal density, expressing either mKate or Venus  
339 fluorescent proteins, were initially loaded in microchannels. The bottom row of images highlights the presence  
340 of invading cells (indicated by black arrowheads) within otherwise clonal clusters. Green: *C. crescentus* mKate.  
341 Magenta: *C. crescentus* Venus. Scale bars: 10  $\mu\text{m}$ . (b) Distribution of cross-lineage colony distances (i.e.



342 distance between green colonies and their nearest magenta neighbor, and vice-versa) for two representative  
343 mean flow velocities ( $7 \text{ mm}\cdot\text{s}^{-1}$  and  $68 \text{ mm}\cdot\text{s}^{-1}$ ). The distribution broadens as flow velocity increases. **(c)** Cross-  
344 lineage colony distance, which can be used as a measure of clonal segregation, as a function of mean flow  
345 velocity. As flow velocity increases, the mean cross-lineage distance increases, indicating that biofilm mixing  
346 decreases. **(d)** *C. crescentus* biofilms on the surface of a microchannel after 6 days of growth under flow. They  
347 recapitulate the initial patterns of colonization shown above. Scale bars:  $10 \mu\text{m}$ .
